# Supplementary material
Source: publisher figshare collection journal article supplement (https://aacr.figshare.com/articles/dataset/_/23782411)

**Supplementary Figure S7- Single-channel fluorescence images of tumors from patients treated with E2.** Exposure-matched paired images are shown. Merged images are shown in Fig. 3A.

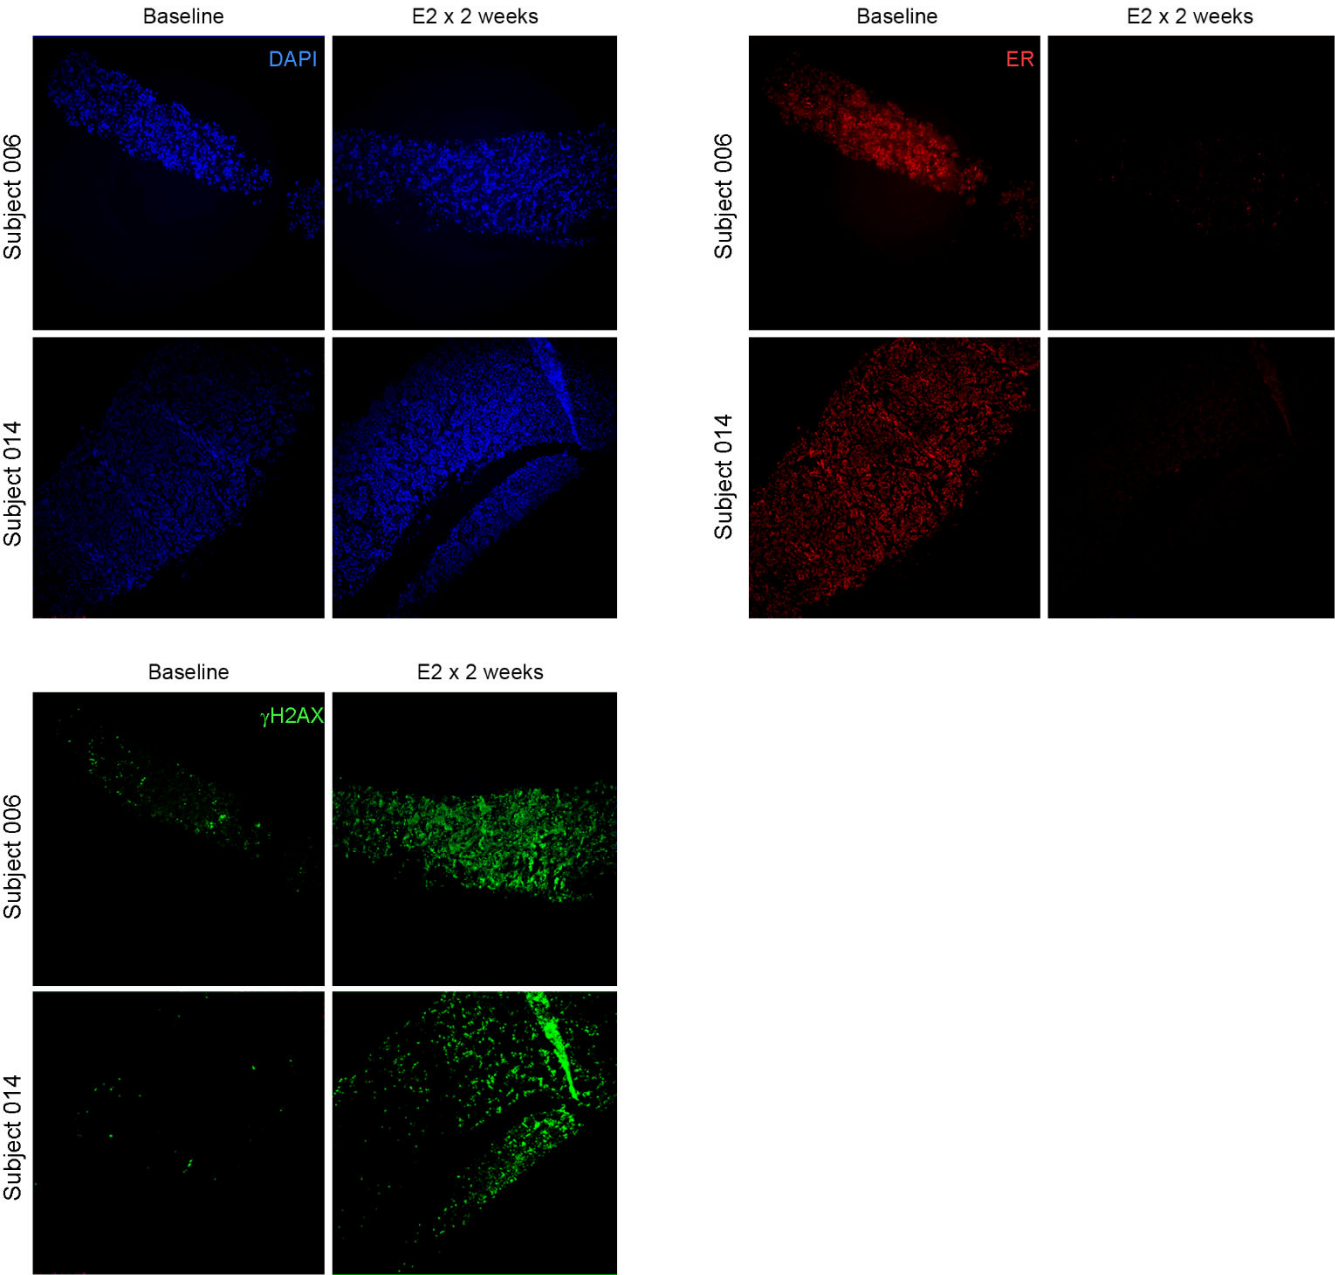

Supplement: Supplementary file 1 [file 41715988]
